# Supplementary material for: Depression, Antidepressant Use, and Breast Cancer Risk in Pre- and Postmenopausal Women: A Prospective Cohort Study
Source: Oxford University Press journal article supplement (doi:10.1158/1055-9965.epi-17-0707), 2017-12-20
Supplement: 10559965epi170707-sup-187184_2_supp_4321821_kxlxkj.docx [file 10559965epi170707-sup-187184_2_supp_4321821_kxlxkj.docx]

| **Supplemental Table 1. Age-standardized characteristics of study population at beginning of follow-up period, by antidepressant use status (NHS: 2000)** | | | | |
| --- | --- | --- | --- | --- |
|  | Number of times self-reported antidepressant use on questionnaires up  to and including 2000 cycle | | | |
|  | None N=57.919 | 1 Time N=3,992 | 2 Times N=2,230 | 3+ Times N=2,551 |
| Age, yearsa | 66.5(7.0) | 65.7(7.4) | 65.2(7.3) | 64.5(6.8) |
| White race, % | 97.4 | 98.7 | 98.4 | 98.9 |
| Number of times with severe depressive symptoms, as assessed by MHI-5 |  |  |  |  |
| 0, % | 93.9 | 78.9 | 73.9 | 69.4 |
| 1, % | 4.2 | 12.6 | 15.6 | 17.6 |
| 2, % | 1.2 | 4.9 | 6.3 | 8.4 |
| ≥3, % | 0.6 | 3.5 | 4.2 | 4.7 |
| History of breast cancer in first degree relative, % | 17.4 | 17.5 | 14.7 | 19.9 |
| Mammogram in previous 2 years, % | 93.2 | 94.9 | 94.1 | 95.1 |
| Age at menarche |  |  |  |  |
| ≤12, % | 35.0 | 34.3 | 34.9 | 33.3 |
| 13, % | 39.6 | 40.3 | 40.2 | 41.5 |
| 14+, % | 25.4 | 25.4 | 24.9 | 25.2 |
| Nulliparous, % | 5.2 | 4.7 | 5.4 | 6.2 |
| Age at first birth, yearsb | 25.1(3.3) | 24.9(3.3) | 24.9(3.3) | 24.8(3.1) |
| Parityb | 3.2(1.5) | 3.1(1.4) | 3.1(1.4) | 3.0(1.4) |
| Breastfeeding history |  |  |  |  |
| None/<1 month, % | 46.9 | 48.3 | 47.0 | 46.9 |
| 1 month - <1 year, % | 34.1 | 35.4 | 35.5 | 35.1 |
| 1-<2 years, % | 12.3 | 11.2 | 12.2 | 13.0 |
| ≥2 years, % | 6.8 | 5.1 | 5.3 | 5.0 |
| Postmenopausal, % | 98.7 | 99.0 | 98.8 | 98.9 |
| Age at menopause, yearsc |  |  |  |  |
| <50 years, % | 42.1 | 44.8 | 44.7 | 46.2 |
| 50-<55 years, % | 48.6 | 47.1 | 48.6 | 46.4 |
| ≥55 years, % | 9.3 | 8.1 | 6.7 | 7.4 |
| History of benign breast disease, % | 49.7 | 55.4 | 57.8 | 60.3 |
| Type of postmenopausal hormone therapy use |  |  |  |  |
| Premenopausal, % | 1.4 | 1.1 | 1.2 | 1.2 |
| Never user, % | 24.9 | 14.4 | 13 | 11.4 |
| Unopposed estrogen, % | 33.8 | 42.5 | 42.6 | 46.4 |
| Estrogen + progesterone, % | 29.9 | 30.9 | 31.3 | 28.7 |
| Other, % | 9.9 | 11.1 | 11.8 | 12.3 |
| Body mass index, kg/m2 |  |  |  |  |
| <25 kg/m2, % | 42.5 | 37.5 | 33.0 | 33.9 |
| 25-<30 kg/m2, % | 35.0 | 32.5 | 35.0 | 32.4 |
| ≥30 kg/m2, % | 22.4 | 30.0 | 32.0 | 33.8 |
| Early life somatotyped | 2.7(1.2) | 2.7(1.2) | 2.8(1.2) | 2.8(1.2) |
| Diabetes, % | 8.4 | 12.4 | 14.3 | 13.4 |
| Total physical activity, MET-hrs/wk |  |  |  |  |
| <3 MET-hrs/wk, % | 23.4 | 32.9 | 36.9 | 35.4 |
| 3-<9 MET-hrs/wk, % | 22.4 | 23.1 | 21.5 | 22.7 |
| 9-<18 MET-hrs/wk, % | 20.4 | 18.7 | 17.3 | 18.2 |
| 18-<27 MET-hrs/wk, % | 13.0 | 10.3 | 8.7 | 9.9 |
| ≥27 MET-hrs/wk, % | 20.8 | 15.0 | 15.6 | 13.8 |
| Alcohol intake, g/de |  |  |  |  |
| None, % | 41.1 | 45.3 | 51.7 | 53.1 |
| <5 g/d, % | 30.2 | 29.4 | 27.4 | 25.9 |
| 5-<15 g/d, % | 19.7 | 17.2 | 13.7 | 13.8 |
| ≥15 g/d, % | 9.1 | 8.1 | 7.3 | 7.2 |
| Alternative Healthy Eating Index scoree | 54.3(10.5) | 53.9(10.6) | 53.5(10.6) | 53.1(10.8) |
| Smoking status |  |  |  |  |
| Never smoker, % | 45.6 | 38.6 | 38.9 | 37.0 |
| Past smoker, % | 45.5 | 51.7 | 50.4 | 51.9 |
| Current smoker, % | 8.9 | 9.8 | 10.7 | 11.1 |
| Values are means (SD) or percentages and are standardized to the age distribution of the study population. Values of polytomous variables may not sum to 100% due to rounding.  aValue is not age adjusted  bAmong parous women only.  cAmong postmenopausal women with a natural or surgical menopause.  dAverage of reported somatotype at ages 10 and 20.  eBased on data from 1998 (NHS) or 2001 (NHSII) questionnaire. | | | | |

| **Supplemental Table 2. Age-standardized characteristics of study population at beginning of follow-up period, by antidepressant use status (NHSII:2003)** | | | | |
| --- | --- | --- | --- | --- |
|  | Number of times self-reported antidepressant use on questionnaires up  to and including 2003 cycle | | | |
|  | None N=64,347 | 1 Time N=7,808 | 2 Times N=7,654 | 3+ Times N=10,011 |
| Age, yearsa | 48.2(4.7) | 48.1(4.7) | 48.8(4.6) | 49.2(4.4) |
| White race, % | 95.3 | 97.5 | 97.2 | 98.2 |
| Number of times with severe depressive symptoms, as assessed by MHI-5 |  |  |  |  |
| 0, % | 89.0 | 75.5 | 71.3 | 60.6 |
| 1, % | 7.6 | 16.0 | 17.4 | 22.4 |
| 2, % | 2.4 | 6.0 | 7.6 | 11.4 |
| ≥3, % | 1.0 | 2.5 | 3.7 | 5.6 |
| History of breast cancer in first degree relative, % | 14.9 | 14.6 | 14.6 | 14.7 |
| Mammogram in previous 2 years, % | 84.8 | 87.0 | 86.4 | 85.5 |
| Age at menarche |  |  |  |  |
| ≤12, % | 54.4 | 55.3 | 55.9 | 57.2 |
| 13, % | 27.6 | 27.0 | 26.6 | 26.3 |
| 14+, % | 17.9 | 17.7 | 17.5 | 16.5 |
| Nulliparous, % | 16.8 | 16.9 | 19.1 | 21.1 |
| Age at first birth, yearsb | 26.6(4.7) | 26.3(4.9) | 26.1(5.0) | 26.1(4.9) |
| Parityb | 2.3 (1.0) | 2.3 (0.9) | 2.2 (1.0) | 2.2 (0.9) |
| Breastfeeding history |  |  |  |  |
| None/<1 month, % | 18.8 | 19.9 | 20.0 | 20.8 |
| 1 month - <1 year, % | 33.5 | 35.7 | 37.1 | 37.3 |
| 1-<2 years, % | 25.0 | 23.8 | 23.8 | 23.5 |
| ≥2 years, % | 22.7 | 20.5 | 19.1 | 18.4 |
| Postmenopausal, % | 41.2 | 46.0 | 47.9 | 49.8 |
| Age at menopause, yearsc |  |  |  |  |
| <50 years, % | 59.4 | 63.3 | 67.0 | 69.8 |
| 50-<55 years, % | 38.3 | 35.3 | 31.4 | 28.6 |
| ≥55 years, % | 2.3 | 1.4 | 1.7 | 1.6 |
| History of benign breast disease, % | 49.0 | 54.5 | 57.0 | 59.2 |
| Current oral contraceptive use, % | 85.7 | 91.1 | 90.9 | 91.2 |
| Type of postmenopausal hormone therapy use |  |  |  |  |
| Premenopausal, % | 63.2 | 59.5 | 56.8 | 55.4 |
| Never user, % | 15.4 | 12.8 | 13.8 | 13.0 |
| Unopposed estrogen, % | 10.5 | 14.3 | 15.8 | 17.9 |
| Estrogen + progesterone, % | 8.3 | 10.2 | 9.4 | 9.1 |
| Other, % | 2.6 | 3.3 | 4.1 | 4.7 |
| Body mass index, kg/m2 |  |  |  |  |
| <25 kg/m2, % | 47.8 | 40.4 | 39.2 | 33.6 |
| 25-<30 kg/m2, % | 28.1 | 28.6 | 28.6 | 28.0 |
| ≥30 kg/m2, % | 24.0 | 31.0 | 32.2 | 38.4 |
| Early life somatotyped | 2.9(1.1) | 3.0(1.1) | 3.0(1.2) | 3.1(1.2) |
| Diabetes, % | 3.3 | 4.8 | 5.6 | 7.2 |
| Total physical activity, MET-hrs/wk |  |  |  |  |
| <3 MET-hrs/wk, % | 18.4 | 21.1 | 23.2 | 28.1 |
| 3-<9 MET-hrs/wk, % | 20.5 | 22.6 | 22.2 | 22.2 |
| 9-<18 MET-hrs/wk, % | 20.2 | 20.3 | 18.9 | 18.5 |
| 18-<27 MET-hrs/wk, % | 13.6 | 12.5 | 12.4 | 11.4 |
| ≥27 MET-hrs/wk, % | 27.3 | 23.5 | 23.2 | 19.7 |
| Alcohol intake, g/de |  |  |  |  |
| None, % | 35.2 | 35.6 | 37.7 | 42.6 |
| <5 g/d, % | 32.9 | 32.3 | 31.4 | 31.0 |
| 5-<15 g/d, % | 20.8 | 20.7 | 19.7 | 16.8 |
| ≥15 g/d, % | 11.0 | 11.4 | 11.2 | 9.6 |
| Alternative Healthy Eating Index scoree | 54.7(13.3) | 54.6(13.1) | 53.9(13.2) | 52.9(13.0) |
| Smoking status |  |  |  |  |
| Never smoker, % | 67.2 | 60.1 | 58.7 | 57.1 |
| Past smoker, % | 25.0 | 29.2 | 29.6 | 30.6 |
| Current smoker, % | 7.8 | 10.7 | 11.7 | 12.3 |
| Values are means (SD) or percentages and are standardized to the age distribution of the study population. Values of polytomous variables may not sum to 100% due to rounding.  aValue is not age adjusted  bAmong parous women only.  cAmong postmenopausal women with a natural or surgical menopause.  dAverage of reported somatotype at ages 10 and 20.  eBased on data from 2001 questionnaire. | | | | |
